# Supplementary material for: Efficacy and safety of avelumab treatment in patients with metastatic Merkel cell carcinoma: experience from a global expanded access program
Source: PubMed Central journal article supplement — J Immunother Cancer. 2020 Apr 8;8(1):e000313. doi: 10.1136/jitc-2019-000313 (PMC7252959; doi:10.1136/jitc-2019-000313), 2020-04-08
Supplement: jitc-2019-000313supp001.pdf [file jitc-2019-000313supp001.pdf]

## Supplementary information

## Additional file 1. Patients and disposition

| Countries      | Official requests, n | Not approved, n | Withdrawn before approval, n | Approved, n | Withdrawn after approval but before supply, n | Drug supplied, n | Response data, n |
|----------------|----------------------|-----------------|------------------------------|-------------|-----------------------------------------------|------------------|------------------|
| Argentina      | 17                   | 3               |                              | 14          | 3                                             | 11               | 6                |
| Australia      | 83                   | 9               |                              | 74          | 9                                             | 65               | 38               |
| Austria        | 3                    |                 |                              | 3           | 1                                             | 2                | 2                |
| Belgium        | 37                   | 3               | 1                            | 33          | 1                                             | 32               | 16               |
| Brazil         | 23                   |                 |                              | 23          | 8                                             | 15               | 9                |
| Canada         | 48                   | 6               |                              | 42          | 6                                             | 36               | 23               |
| Chile          | 4                    |                 |                              | 4           |                                               | 4                | 1                |
| China          | 1                    |                 |                              | 1           |                                               | 1                |                  |
| Colombia       | 2                    |                 |                              | 2           |                                               | 2                | 1                |
| Costa Rica     | 1                    |                 |                              | 1           |                                               | 1                | 1                |
| Czech Republic | 1                    | 1               |                              |             |                                               |                  |                  |
| Denmark        | 2                    |                 |                              | 2           |                                               | 2                | 2                |
| Finland        | 1                    |                 | 1                            |             |                                               |                  |                  |
| France         | 96                   | 8               | 2                            | 86          | 3                                             | 83               | 24               |
| Germany        | 27                   | 4               | 1                            | 22          | 2                                             | 20               | 7                |
| Greece         | 8                    |                 |                              | 8           | 2                                             | 6                | 3                |
| Guatemala      | 1                    |                 |                              | 1           | 1                                             |                  |                  |
| Hong Kong      | 6                    |                 |                              | 6           |                                               | 6                | 3                |
| Hungary        | 2                    | 1               |                              | 1           |                                               | 1                |                  |
| Iceland        | 1                    | 1               |                              |             |                                               |                  |                  |

|                    |            |           |           |            |           |            |            |
|--------------------|------------|-----------|-----------|------------|-----------|------------|------------|
| India              | 2          |           |           | 2          |           | 2          | 1          |
| Ireland            | 2          | 1         |           | 1          |           | 1          | 1          |
| Israel             | 13         |           |           | 13         | 2         | 11         | 7          |
| Italy              | 109        | 5         | 2         | 102        | 7         | 95         | 55         |
| Republic of Korea  | 4          |           |           | 4          |           | 4          | 2          |
| Lebanon            | 4          |           |           | 4          | 2         | 2          | 1          |
| Mexico             | 2          |           |           | 2          | 1         | 1          | 1          |
| The Netherlands    | 8          |           |           | 8          | 1         | 7          | 3          |
| New Zealand        | 2          |           |           | 2          |           | 2          | 1          |
| Norway             | 2          | 1         |           | 1          |           | 1          | 1          |
| Poland             | 10         |           |           | 10         |           | 10         | 5          |
| Portugal           | 4          |           |           | 4          |           | 4          | 2          |
| Qatar              | 1          |           |           | 1          |           | 1          |            |
| Russian Federation | 11         |           |           | 11         | 1         | 10         | 4          |
| Singapore          | 1          |           |           | 1          |           | 1          |            |
| Spain              | 17         | 3         | 2         | 12         | 2         | 10         | 6          |
| Switzerland        | 7          |           |           | 7          | 2         | 5          | 2          |
| Taiwan             | 6          |           |           | 6          | 1         | 5          | 3          |
| Turkey             | 11         |           |           | 11         |           | 11         | 5          |
| United Kingdom     | 29         | 2         |           | 27         | 6         | 21         | 4          |
| United States      | 11         | 3         | 2         | 6          | 3         | 3          |            |
| <b>Total</b>       | <b>620</b> | <b>51</b> | <b>11</b> | <b>558</b> | <b>64</b> | <b>494</b> | <b>240</b> |

**Additional file 2.** Summary of requests for avelumab in the expanded access program.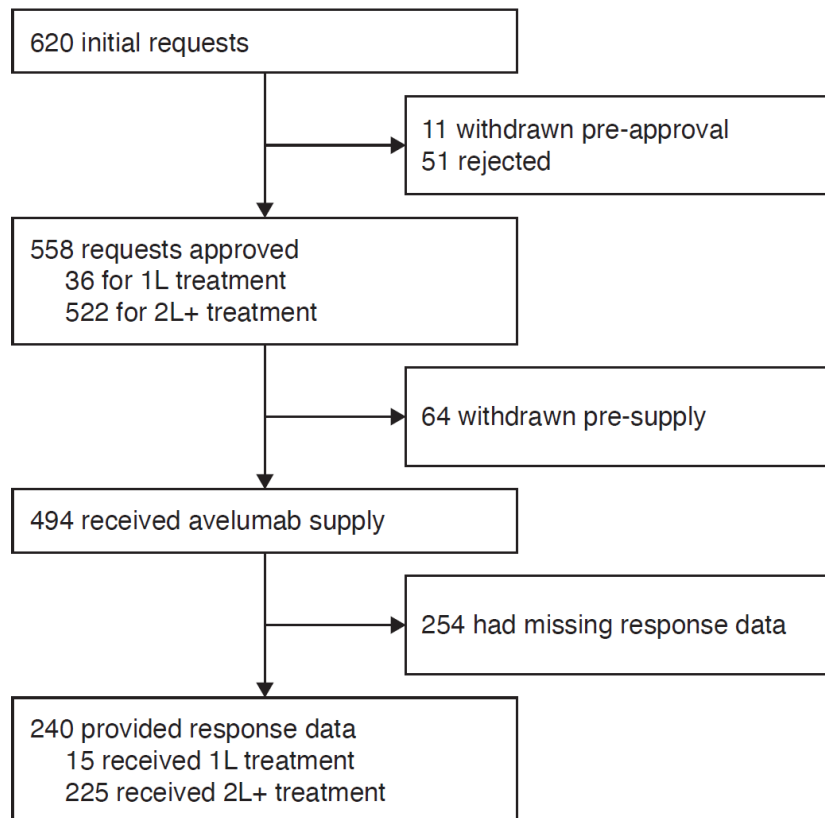

1L, first-line; 2L+, second-line or later.
